# Supplementary material
Source: PubMed Central journal article supplement (PMC3808608)
Supplement: 1313473110_pnas.201313473SI.pdf [file 1313473110_pnas.201313473SI.pdf]

# Supporting Information

Azpurua et al. 10.1073/pnas.1313473110

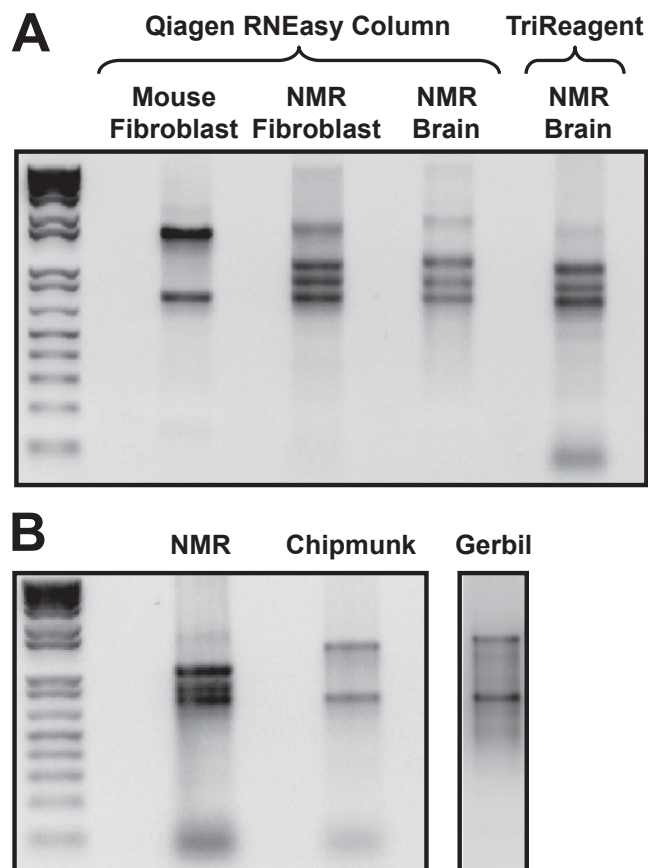

**Fig. S1.** Naked mole-rat (NMR) ribosomal RNA (rRNA) shows an unusual pattern with cleaved 28S rRNA. (A) NMR break pattern is seen independent of extraction method used or whether RNA is extracted from frozen tissues or cell culture. (B) RNA extracted from two additional nonmodel rodents does not show 28S rRNA cleavage. The RNA was separated on native 1% gel.



**Table S2. List of oligonucleotide primers used for 3' RACE and 5' RACE of NMR 28S ribosomal RNA cleavage point**

| Primer         | Sequence (5'→3')               | Specificity  |
|----------------|--------------------------------|--------------|
| 28S-5P2        | GGCGACCCGCTGAATTTAAGCATATTAGTC | NMR 28S rRNA |
| 28S-P6-Forward | GCCGTACCCATATCCGCAGCAG         | NMR 28S rRNA |
| 28S-P7-Reverse | GCCCTTAGAGCCAATCCTTATCCCGAA    | NMR 28S rRNA |
| SP3-Forward    | GACAGTGCCAGGTGGGGAGTTTGAC      | NMR 28S rRNA |
| 28S-3P         | ACAACCCCTTGTCGAGGGCTG          | NMR 28S rRNA |
